# Supplementary material for: Quantitative proteomic and phosphoproteomic comparison of human colon cancer DLD-1 cells differing in ploidy and chromosome stability
Source: PubMed Central journal article supplement — Mol Biol Cell. 2018 May 1;29(9):1031–47. doi: 10.1091/mbc.E17-10-0577 (PMC5921571; doi:10.1091/mbc.e17-10-0577), 2018-05-01
Supplement: mbc-29-1031-s001.pdf [file mbc-29-1031-s001.pdf]

# Supplemental Materials

*Molecular Biology of the Cell*

Viganó et al.

## Supplemental Material

**Figure S1:** Comparison of randomly selected CIN and MIN cells.

(A) Table lists ploidy and chromosome numbers for 8 human cancer cell lines used in (B), including diploid telomerase-immortalized (hTERT) RPE1 cells, diploid microsatellite instable (MIN) and aneuploid chromosomally instable (CIN) cells. Chromosome counts were obtained from the American Tissue Culture Consortium (ATCC). (B) Hierarchical clustering based on the LC-MS/MS results for the cell lines listed in (A), using the tandem mass tag (TMT)-labeling approach. The vertical dimension depicts ~7,500 proteins detected in the indicated cell lines. The heat map shows the degree of deregulation versus the diploid control cell line hTERT-RPE1. Data are from a single biological replicate, conceived as a pilot experiment (see table S1).

**Figure S2:** Establishment of DLD-1-derived cell lines differing in ploidy.

(A) Left panel: micrographs show mitotic spreads stained with whole-chromosome DNA probes for the indicated chromosomes (chromosomes 3 and 4 in 2N, 4N and PTA; chromosomes 5 and 7 in Tr7 clones). Scale bars represent 10  $\mu$ m. Right panel: histogram shows the frequencies of chromosome copy number counts. Values are normalized for the number of counted cells (n). Data are from two biological replicates. (B) Histograms show the frequencies of chromosome mis-segregation events in trisomic clones. Data relate to Fig. 2A. Error bars represent SD. Values indicate the number of counted cells, data are from three biological replicates, unpaired two-tailed t-test. (C) Upper panel: Spindle geometry

measurements in metaphase cells. Scale bar represents 5  $\mu\text{m}$ , DNA was stained with DAPI. Lower left panel: representative  $\alpha$ -tubulin staining and schematic showing spindle geometry measurement approach. Lower right panels: dot plots showing mitotic spindle length, width and angle measurements for indicated cell lines. Horizontal bars show mean values, the numbers of counted cells are indicated, data are from two biological replicates. Two-tailed *t*-test: \* $P < 0.05$ , \*\* $P < 0.01$ , \*\*\* $P < 0.001$  and \*\*\*\* $P < 0.0001$ . (D) Left panel: micrographs of fixed cells stained with antibodies raised against the centriole marker CP110 and  $\alpha$ -tubulin. Scale bar represents 5  $\mu\text{m}$ , DNA was stained with DAPI. Right panel: dot plots show centrioles and centrosomes numbers in the indicated cell lines, using CP110 and Cep135 as markers for centrioles and centrosomes, respectively. Horizontal bars indicate mean values, numbers of counted cells are indicated, data are from two biological replicates.

**Figure S3:** Comparative proteomic analysis of DLD-1 derived cells.

(A) Box whisker plot shows the relative abundance of proteins (*versus* parental diploid DLD-1 cells) functionally associated with protein proteolysis, protein folding, autophagy, DNA damage and oxidative stress response. Each dot represents an incident of a significant ( $p < 0.1$ ) deregulation that was observed in the 4N clone or in at least one PTA clone or Tr7 clone. Tables on the right describe the GO terms that were considered for the analysis. (B) Box whisker plot showing the relative abundance (*versus* parental diploid DLD-1 cells) of proteins functionally related to type I interferon signaling. P-values for the proteins shown are below 0.05. Data relate to experiment shown in Fig. 4B, C and D. Data compiled in panels A and B are from biological triplicates (table S2). (C) Left panel: micrographs of cells treated

with BrdU and stained with anti-BrdU antibodies and DAPI. Acid denaturing of DNA was omitted to avoid prevalent nuclear staining; extra-nuclear BrdU foci represent cytoplasmic DNA. Scale bar represents 10  $\mu$ m. Right panel: box whisker plot showing the number of cytoplasmic BrdU foci for the indicated cell lines. Data come from biological duplicates.

**Figure S4:** Targeted analysis of protein expression in DLD-1-derived cells.

(A, B) Tables show an enrichment analysis of the 500 most deregulated phospho-peptides per cell line based on the TSG/OG and CIN/cell division inclusion lists. The number of inclusion list matches (signlList) and non-matches (totSign) were compared to random inclusion list matches (nonSignlList) and non-matches (totNonSign) in a human proteome background. Significance (ftPValue) was calculated using Fisher's exact test. Shaded areas highlight the most significant enrichments. We note that one of the two trisomic clones showed an apparently significant enrichment, but because this was seen in only one of two near-identical clones, the significance, if any, of this observation is difficult to assess (C) Dot plots show the relative abundance of selected mitotic proteins in 4N, PTA and Tr7 clones. Note that a less stringent p-value cut off of 0.1 was applied. (D) Dot plots show the relative abundance of proteins belonging to the MCM and ORC complexes in 4N, PTA and Tr7 clones. Data compiled in panels C and D come from biological triplicates (table S4)

**Figure S5:** Comparative phospho-proteomic analysis of DLD-1 derived cells.

(A, B) Tables list the results of a gene ontology (GO)-term enrichment analysis of phospho-peptides up-regulated across 4N and PTA clones (A) or 4N and Tr7 clones (B). Enrichment

analysis was carried out for the 500 most deregulated phospho-peptides per condition ( $p > 0.05$ ), the 20 most significant enrichments are shown.

**Figure S6:** Targeted analysis of protein phosphorylation in DLD-1-derived cells.

(A, B) STRING functional network analysis of the phospho-peptides belonging to clusters shown in (Fig. 5E ). Nodal connections are based on a confidence value of 0.9 using experimental and database evidence. Solid lines indicate intra-network, dashed lines inter-network connections. (C, D) STRING functional network analysis of the phospho-peptides obtained by clustering through the fuzzy C-means algorithm, as shown in Fig. 5F. Nodal connections are based on a confidence value of 0.9 using experimental and database evidence. Solid lines indicate intra-network, dashed lines inter-network connections.

**Figure S7:** Targeted analysis of protein phosphorylation in DLD-1-derived cells.

(A) Tables show an enrichment analysis of the 500 most deregulated phospho-peptides per cell line, using the CIN/cell division inclusion list. The number of inclusion list matches (signlList) and non-matches (totSign) were compared to random inclusion list matches (nonSignlList) and non-matches (totNonSign) in a human proteome background. Significance (ftPvalue) was calculated using Fisher's exact test. Shaded areas highlight the most significant enrichments. (B) Dot plot shows selected detection ratios of regulatory phosphorylation sites of the centrosome and mitotic spindle kinase Aurora A (AURKA P-T288), the mitotic kinase Cdk1 (CDK1 P-T14, P-Y15), the cell cycle checkpoint kinase Chk1 (CHK1 P-S286, CHK1 P-S301) and the mitotic spindle kinase Plk1 (Plk1 P-T210). Dashed lines indicate a 2-fold cutoff. (C) Table lists the p-values for phospho-peptide measurements

shown in (B), without applying a p-value cutoff. Data compiled in panels A and B come from biological triplicates (table S4).

**Table S1:** Raw data (spreadsheet) summarizing results from TMT of 8 CIN and MIN cell lines. The first three columns describe the accession number (AC), gene name and protein description of each identified protein. The columns in grey show the relative abundance (log2 ratio versus RPE1) for each entrance in all the considered cell lines. Note that this pilot experiment was only carried out once; hence, no statistical tests for deregulation could be applied.

**Table S2:** Raw data (spreadsheets) summarizing analyses of TMT data. The first spreadsheet contains TMT data of diploid, tetraploid and PTA clones. The first three columns describe the accession number (AC), gene name and protein description of each identified protein. TRUE or FALSE refer to membership of a given protein to CIN/Cell Division, TSGs or OGs list. GO indicate the Gene Ontology annotation relative to Cellular Component (cc), Molecular Function (mf) and Biological Process (bp). The columns in grey show the relative abundance (log2 ratio versus diploid DLD-1) for each entrance in all the considered cell lines, and respective p-values and q-values (False discovery rates). Note that this experiment was performed in biological triplicates. The second spreadsheet contains the same analysis, as described above, for diploid, tetraploid and two trisomic clones. Relative abundance was calculated versus the diploid cell line. The third spreadsheet lists the 18 commonly deregulated proteins (between 4N and two trisomic clones).

**Table S3:** Table refers to Figure 4A and lists only significant proteins, with at least a 1.5 fold change *versus* 2N (p-value cut-off <0.1). Spreadsheets one to four are related to oxidative stress, protein folding, protein lysis and autophagy GO terms, respectively.

**Table S4:** The first spreadsheet contains the components that make up the inclusion lists of tumor suppressor genes (TSGs) and oncogenes (OGs), used for targeted analyses. The second spreadsheet contains the components that make up the CIN/Cell Division inclusion list, used for targeted analysis. These inclusion lists were generated as described in the Materials and methods section.

**Table S5:** Raw data (spreadsheet) summarizing the results of the analyses of phospho-enrichment experiments. The first spreadsheet lists phospho-enriched peptides of diploid, tetraploid and PTA clones. The first four columns describe the identified peptide, the accession number (AC) of the corresponding protein, protein descriptions and type of post-translational modifications (ptm). The subsequent columns indicate the numbers of ptms per identified peptide, the modified residue (\*), and the position of the ptm within the protein. TRUE or FALSE refer to the membership of each protein in the CIN/Cell Division, TSG or OG inclusion lists. GO indicate the Gene Ontology annotation relative to Cellular Component (cc), Molecular Function (mf) and Biological Process (bp). The columns in grey show the relative phosphorylation level (log2 ratio versus diploid DLD-1) for each entrance in all considered cell lines, and respective p-values and q-values (False discovery rates). Note that this experiment was performed in biological triplicates. The second spreadsheet

contains the same analysis, as described above, for diploid, tetraploid and two trisomic clones. Relative abundance was calculated versus the diploid cell line.

**Table S6:** Venn diagram analyses. TRUE or FALSE in the spreadsheets refer to membership of a given protein to the Venn diagram in 4N plus PTA clones (first spreadsheet) or 4N plus trisomic clones (second spreadsheet). Venn diagrams were obtained by selecting the 500 most deregulated phospho-peptides per cell line (based on an FDR of <10%, yielding a total of 1410 phospho-peptides from 807 proteins). Note that this experiment was performed in biological triplicates.

**Table S7:** Fuzzy C-means algorithm analysis. Data for this analysis were obtained from the same biological experiments (in triplicate) as used for Table S5. The first and second spreadsheets list phospho-peptides referring to Figure 5E. The third, fourth and fifth spreadsheets list phospho-peptides referring to Figure 5F. The first columns describe the properties of phosphopeptides as described in Table S5. In subsequent columns, log2 ratios (sample abundance versus 2N) were normalized to have a standard deviation of 1 and a mean of 0 (z-score). The last columns represent mFuzz cluster membership values.

**Table S8:** Drug screening assay spreadsheet. List of targets, incubation time, IC<sub>50</sub> and IC<sub>50</sub> average for each of the tested compounds. Note that biological triplicates were performed only for the compounds that showed a significant IC<sub>50</sub> difference in the first run. Two-tailed *t*-test was used for the significance analysis. NA: no activity was detectable at highest dose of compound.

Figure S1  
A

|       | Name    | Ploidy      | Chromosome Number |
|-------|---------|-------------|-------------------|
| hTERT | RPE1    | Diploid     | 46                |
| MIN   | HCT116  | Diploid     | 46                |
|       | DLD-1   | Diploid     | 46                |
|       | RKO     | Diploid     | 46-50             |
| CIN   | SW480   | Aneuploid   | Hypotriploid      |
|       | HT29    | Aneuploid   | 71                |
|       | Hela-S3 | Aneuploid   | 76-80             |
| Other | Sw837   | Hypodiploid | 40                |

B

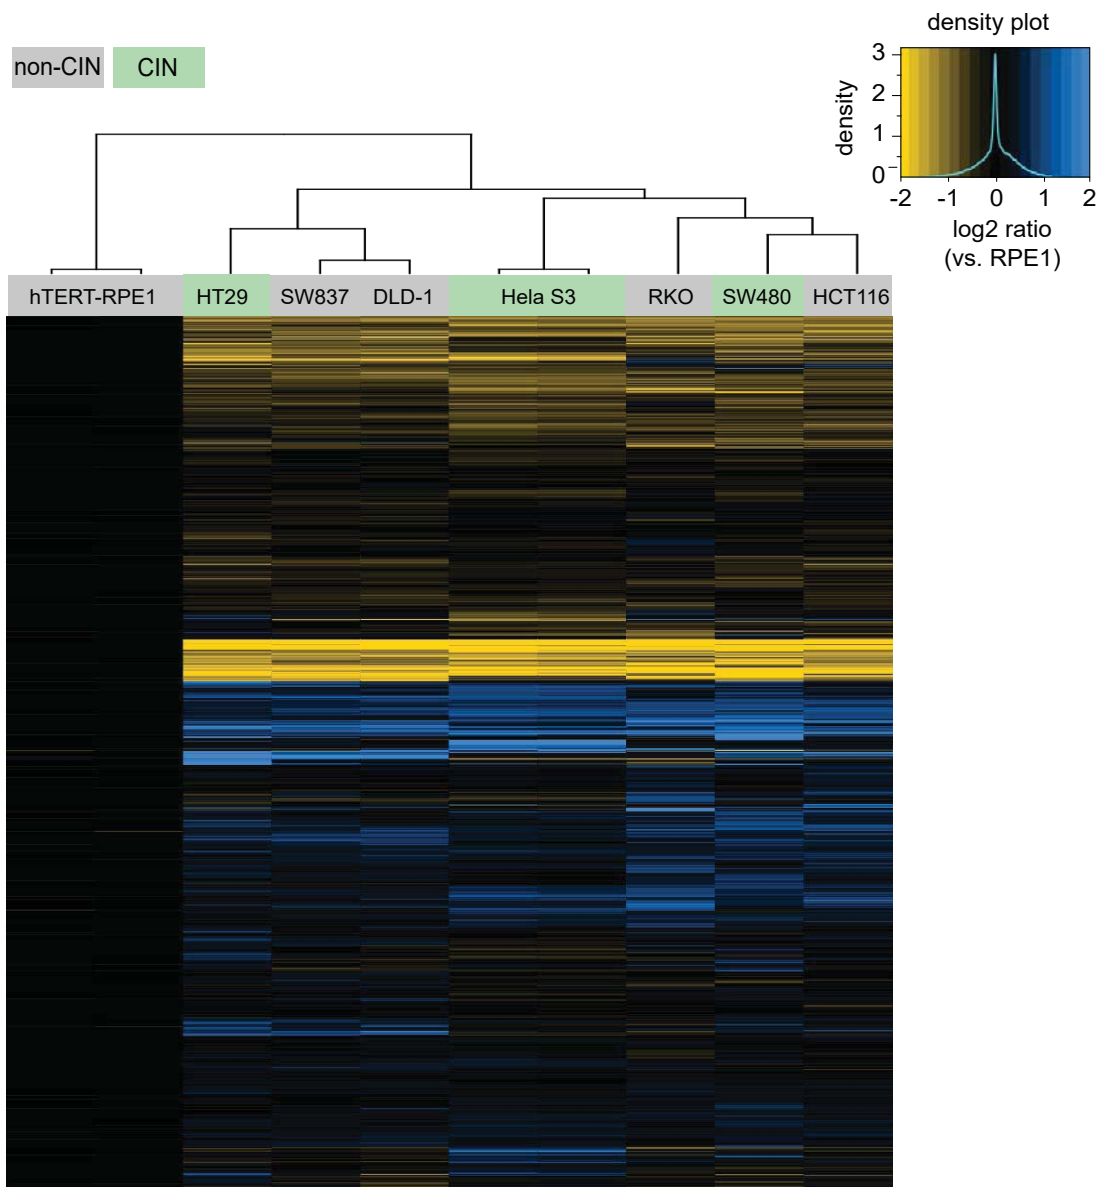

**A**

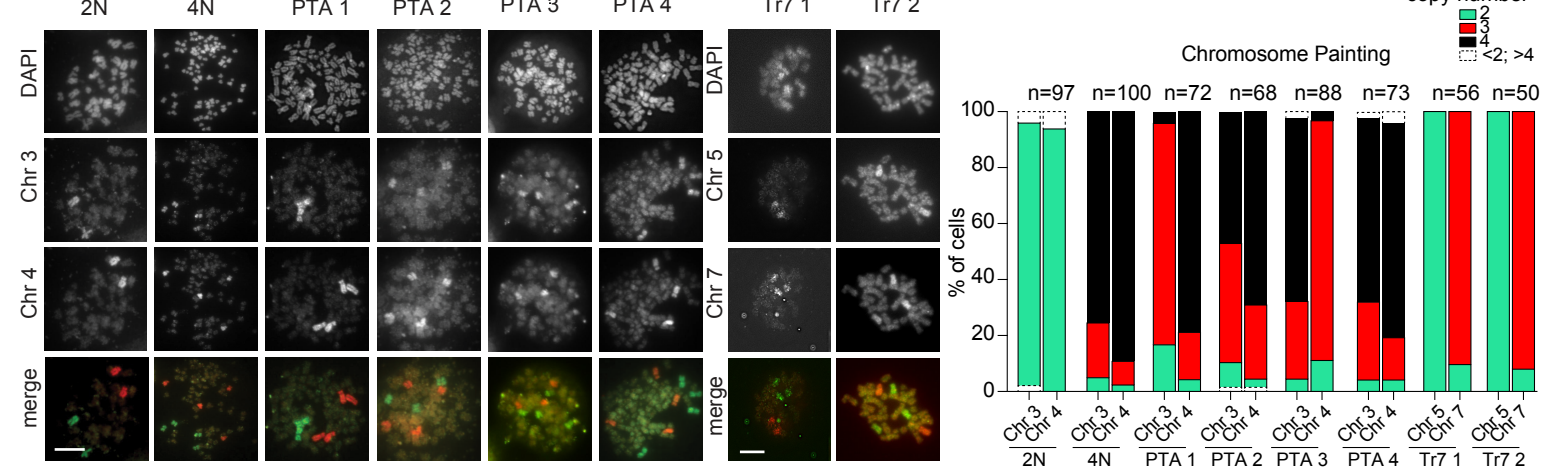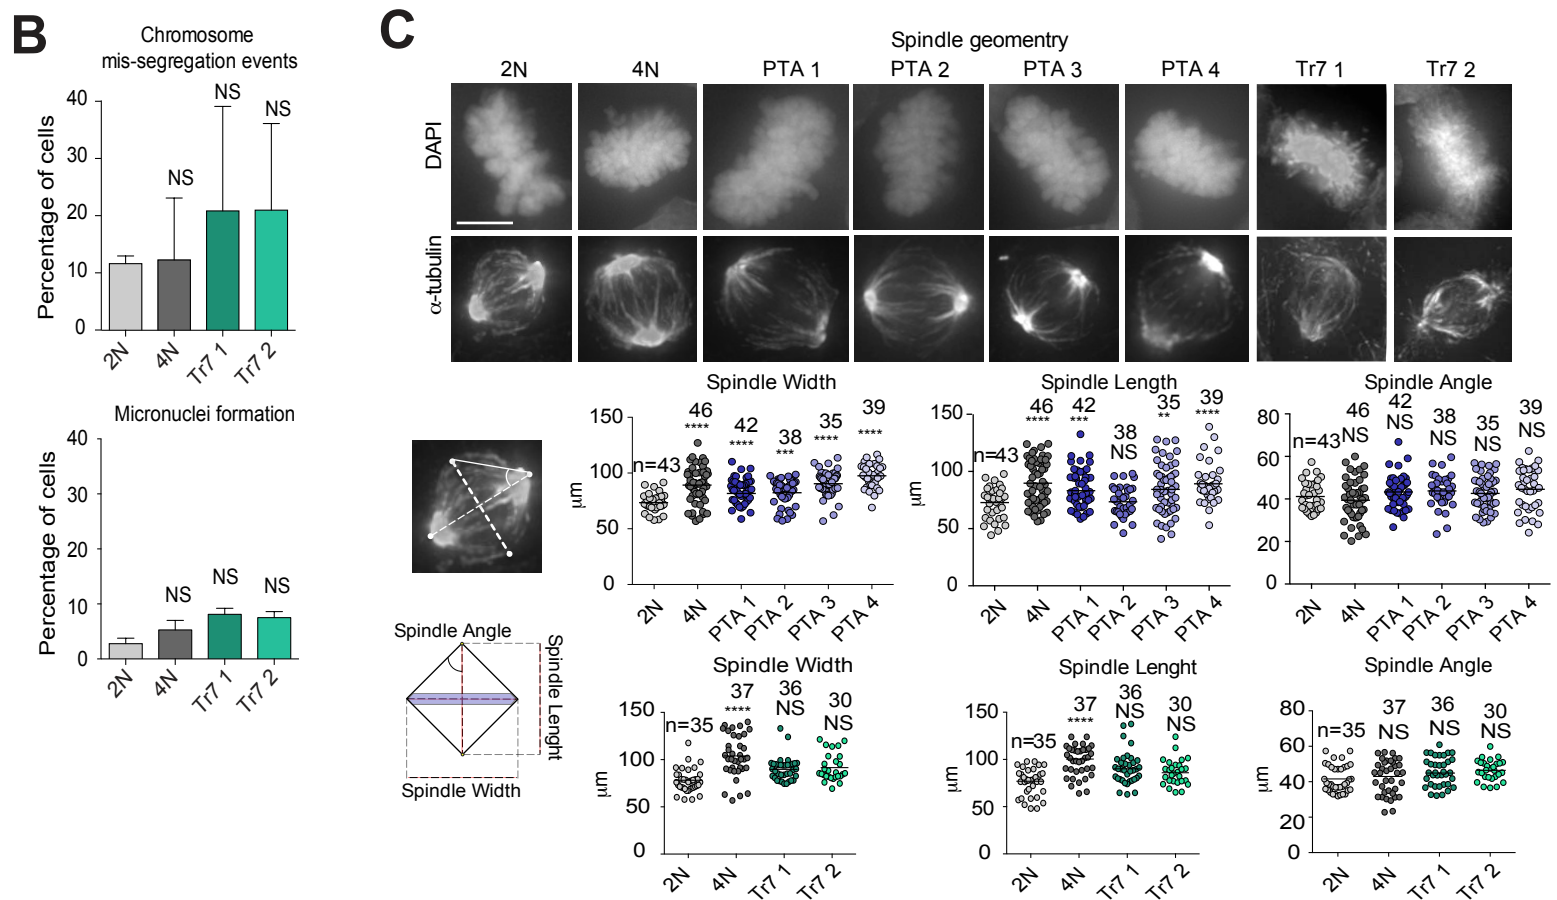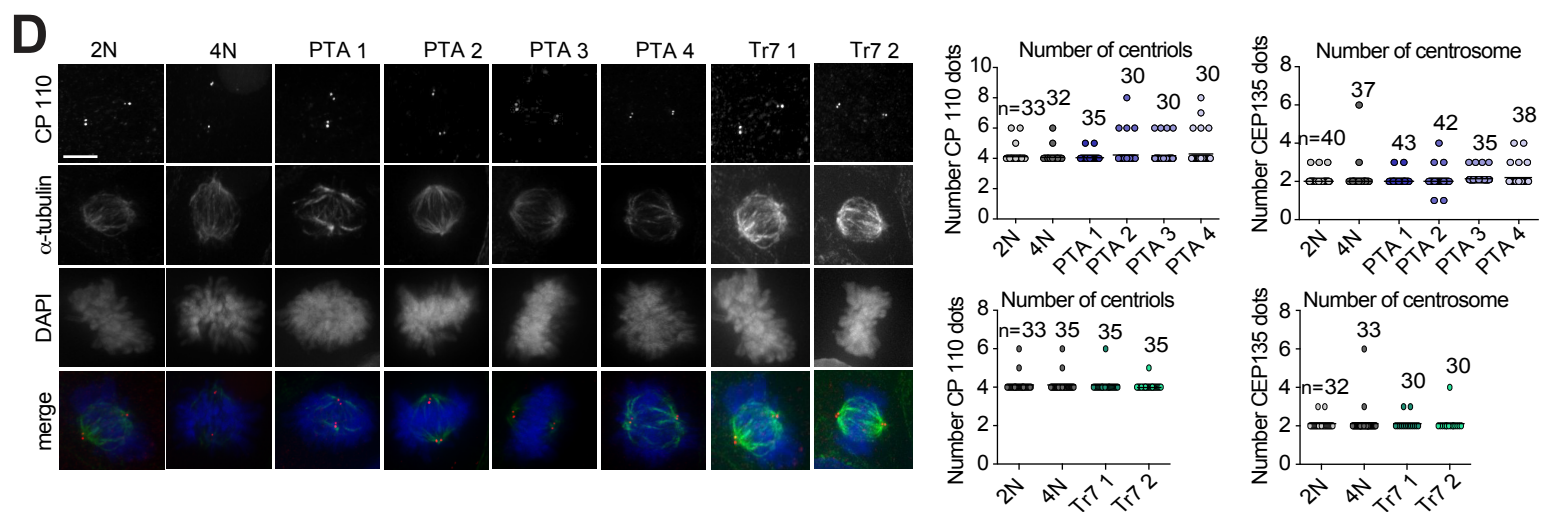

# Figure S3

A

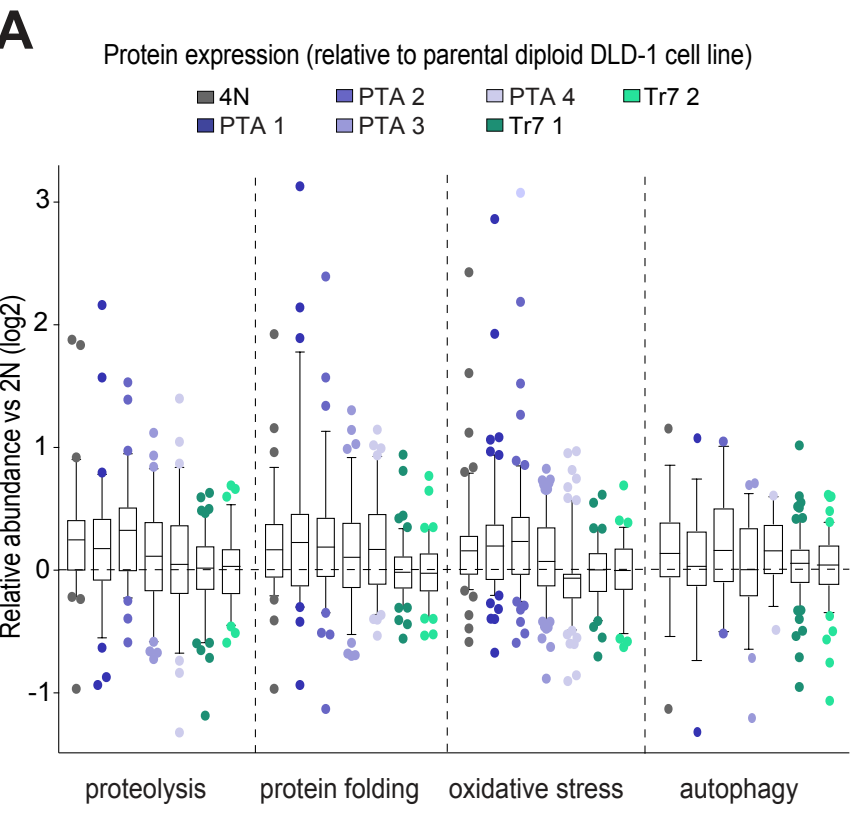

|                     |             |
|---------------------|-------------|
| GO term Proteolysis |             |
| GO:0006508          | proteolysis |

|                         |                                          |
|-------------------------|------------------------------------------|
| GO term Protein Folding |                                          |
| GO:0006457              | protein folding                          |
| GO:0034975              | protein folding in endoplasmic reticulum |

|                          |                                                                                             |
|--------------------------|---------------------------------------------------------------------------------------------|
| GO term Oxidative Stress |                                                                                             |
| GO:0006979               | response to oxidative stress                                                                |
| GO:0034599               | cellular response to oxidative stress                                                       |
| GO:1902882               | regulation of response to oxidative stress                                                  |
| GO:1902883               | negative regulation of response to oxidative stress                                         |
| GO:1902884               | positive regulation of response to oxidative stress                                         |
| GO:0008631               | intrinsic apoptotic signaling pathway in response to oxidative stress                       |
| GO:0043619               | regulation of transcription from RNA polymerase II promoter in response to oxidative stress |
| GO:0032938               | negative regulation of translation                                                          |
| GO:0036475               | response to oxidative stress                                                                |
| GO:1900407               | neuron death in response to oxidative stress                                                |
| GO:0001306               | regulation of cellular response to oxidative stress                                         |
| GO:0001306               | age-dependent response to oxidative stress                                                  |

|                   |                                                               |
|-------------------|---------------------------------------------------------------|
| GO term Autophagy |                                                               |
| GO:0006914        | autophagy                                                     |
| GO:0016236        | macroautophagy                                                |
| GO:0016241        | regulation of macroautophagy                                  |
| GO:0010506        | regulation of autophagy                                       |
| GO:0075044        | autophagy of host cells involved in interaction with symbiont |
| GO:0039521        | suppression by virus of host autophagy                        |
| GO:0034727        | picomeal microautophagy of nucleus                            |

B

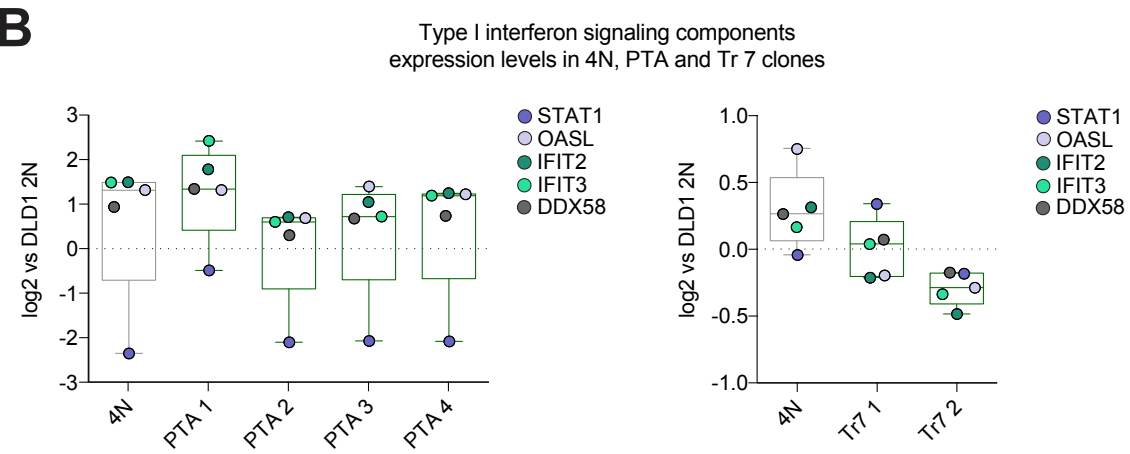

C

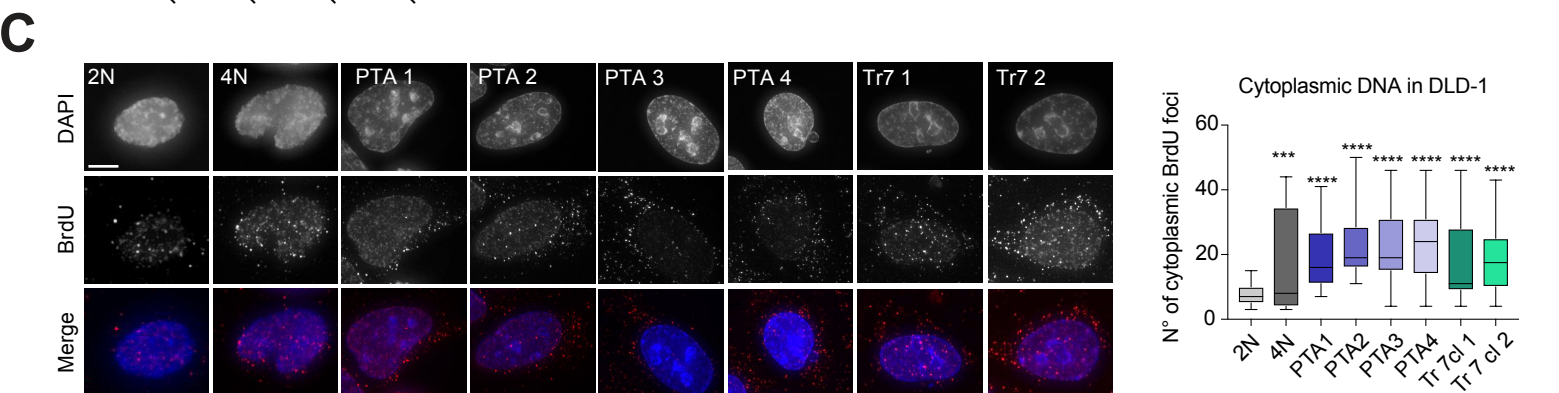

Figure S4

A

Tumour suppressor genes (TSG)

| TSG enrichment analysis of proteins up-regulated in 4N and PTA cells |           |         |              |            |           | TSG enrichment analysis of proteins down-regulated in 4N and PTA cells |           |         |              |            |           |
|----------------------------------------------------------------------|-----------|---------|--------------|------------|-----------|------------------------------------------------------------------------|-----------|---------|--------------|------------|-----------|
|                                                                      | signlList | totSign | nonSignlList | totNonSign | ftPValue  |                                                                        | signlList | totSign | nonSignlList | totNonSign | ftPValue  |
| 4N                                                                   | 6         | 145     | 175          | 5486       | 0.3374176 |                                                                        | 4         | 145     | 175          | 5486       | 0.6771092 |
| PTA 1                                                                | 3         | 128     | 182          | 5479       | 0.7905782 |                                                                        | 0         | 169     | 182          | 5479       | 1.0000000 |
| PTA 2                                                                | 3         | 143     | 181          | 5480       | 0.8425621 |                                                                        | 1         | 153     | 181          | 5480       | 0.9920951 |
| PTA 3                                                                | 0         | 108     | 182          | 5479       | 1.0000000 |                                                                        | 3         | 189     | 182          | 5479       | 0.9425012 |
| PTA 4                                                                | 2         | 156     | 181          | 5480       | 0.9593175 |                                                                        | 2         | 140     | 181          | 5480       | 0.9387884 |

| TSG enrichment analysis of proteins up-regulated in 4N and Tr 7 cells |           |         |              |            |           | TSG enrichment analysis of proteins down-regulated in 4N and Tr 7 cells |           |         |              |            |           |
|-----------------------------------------------------------------------|-----------|---------|--------------|------------|-----------|-------------------------------------------------------------------------|-----------|---------|--------------|------------|-----------|
|                                                                       | signlList | totSign | nonSignlList | totNonSign | ftPValue  |                                                                         | signlList | totSign | nonSignlList | totNonSign | ftPValue  |
| 4N                                                                    | 3         | 157     | 213          | 7160       | 0.8381178 |                                                                         | 3         | 137     | 213          | 7160       | 0.7682216 |
| Tr7 d1                                                                | 1         | 155     | 213          | 7160       | 0.9882724 |                                                                         | 5         | 139     | 213          | 7160       | 0.4109171 |
| Tr7 d2                                                                | 2         | 132     | 215          | 7158       | 0.8997608 |                                                                         | 2         | 164     | 215          | 7158       | 0.9520510 |

Oncogenes (OG)

| OG enrichment analysis of proteins up-regulated in 4N and PTA cells |           |         |              |            |           | OG enrichment analysis of proteins down-regulated in 4N and PTA cells |         |              |            |           |
|---------------------------------------------------------------------|-----------|---------|--------------|------------|-----------|-----------------------------------------------------------------------|---------|--------------|------------|-----------|
|                                                                     | signlList | totSign | nonSignlList | totNonSign | ftPValue  | signlList                                                             | totSign | nonSignlList | totNonSign | ftPValue  |
| 4N                                                                  | 1         | 150     | 87           | 5574       | 0.9011513 | 4                                                                     | 145     | 87           | 5574       | 0.2099882 |
| PTA1                                                                | 1         | 131     | 88           | 5573       | 1.0000000 | 4                                                                     | 165     | 88           | 5573       | 0.2815287 |
| PTA 2                                                               | 0         | 146     | 89           | 5572       | 1.0000000 | 3                                                                     | 151     | 89           | 5572       | 0.4444776 |
| PTA 3                                                               | 0         | 108     | 89           | 5572       | 1.0000000 | 3                                                                     | 189     | 89           | 5572       | 0.5862782 |
| PTA 4                                                               | 2         | 156     | 89           | 5572       | 0.7117185 | 1                                                                     | 141     | 89           | 5572       | 0.8922519 |

| OG enrichment analysis of proteins up-regulated in 4N and Tr 7 cells |           |         |              |            |           | OG enrichment analysis of proteins down-regulated in 4N and Tr 7 cells |           |         |              |            |           |
|----------------------------------------------------------------------|-----------|---------|--------------|------------|-----------|------------------------------------------------------------------------|-----------|---------|--------------|------------|-----------|
|                                                                      | signlList | totSign | nonSignlList | totNonSign | ftPValue  |                                                                        | signlList | totSign | nonSignlList | totNonSign | ftPValue  |
| 4N                                                                   | 4         | 156     | 104          | 7269       | 0.2017603 |                                                                        | 1         | 139     | 104          | 7269       | 0.8612769 |
| Tr7 d1                                                               | 4         | 152     | 105          | 7268       | 0.1946339 |                                                                        | 0         | 144     | 105          | 7268       | 1.0000000 |
| Tr7 d2                                                               | 4         | 130     | 105          | 7268       | 0.1353750 |                                                                        | 0         | 166     | 105          | 7268       | 1.0000000 |

B

CIN/Cell division inclusion list

| Enrichment analysis of proteins up-regulated in 4N and PTA cells |           |         |              |            |           | Enrichment analysis of proteins down-regulated in 4N and PTA cells |         |              |            |           |
|------------------------------------------------------------------|-----------|---------|--------------|------------|-----------|--------------------------------------------------------------------|---------|--------------|------------|-----------|
|                                                                  | signlList | totSign | nonSignlList | totNonSign | ftPValue  | signlList                                                          | totSign | nonSignlList | totNonSign | ftPValue  |
| 4N                                                               | 13        | 138     | 711          | 4950       | 0.9289159 | 11                                                                 | 137     | 711          | 4962       | 0.4440535 |
| PTA 1                                                            | 15        | 116     | 699          | 4962       | 0.6477453 | 22                                                                 | 147     | 699          | 4962       | 0.4440535 |
| PTA 2                                                            | 21        | 125     | 700          | 4961       | 0.2957998 | 15                                                                 | 139     | 700          | 4961       | 0.8415546 |
| PTA 3                                                            | 9         | 99      | 706          | 4955       | 0.9108165 | 21                                                                 | 171     | 706          | 4955       | 0.7450646 |
| PTA 4                                                            | 10        | 148     | 706          | 4955       | 0.9916212 | 20                                                                 | 122     | 706          | 4955       | 0.3435905 |

| Enrichment analysis of proteins up-regulated in 4N and Tr 7 cells |           |         |              |            |           | Enrichment analysis of proteins down-regulated in 4N and Tr 7 cells |           |         |              |            |           |
|-------------------------------------------------------------------|-----------|---------|--------------|------------|-----------|---------------------------------------------------------------------|-----------|---------|--------------|------------|-----------|
|                                                                   | signlList | totSign | nonSignlList | totNonSign | ftPValue  |                                                                     | signlList | totSign | nonSignlList | totNonSign | ftPValue  |
| 4N                                                                | 11        | 149     | 681          | 6692       | 0.8624752 |                                                                     | 12        | 128     | 681          | 6692       | 0.6403011 |
| Tr7 d1                                                            | 20        | 136     | 679          | 6694       | 0.1097800 |                                                                     | 5         | 139     | 679          | 6694       | 0.9959316 |
| Tr7 d2                                                            | 19        | 115     | 680          | 6693       | 0.0605936 |                                                                     | 5         | 161     | 680          | 6693       | 0.9990127 |

C

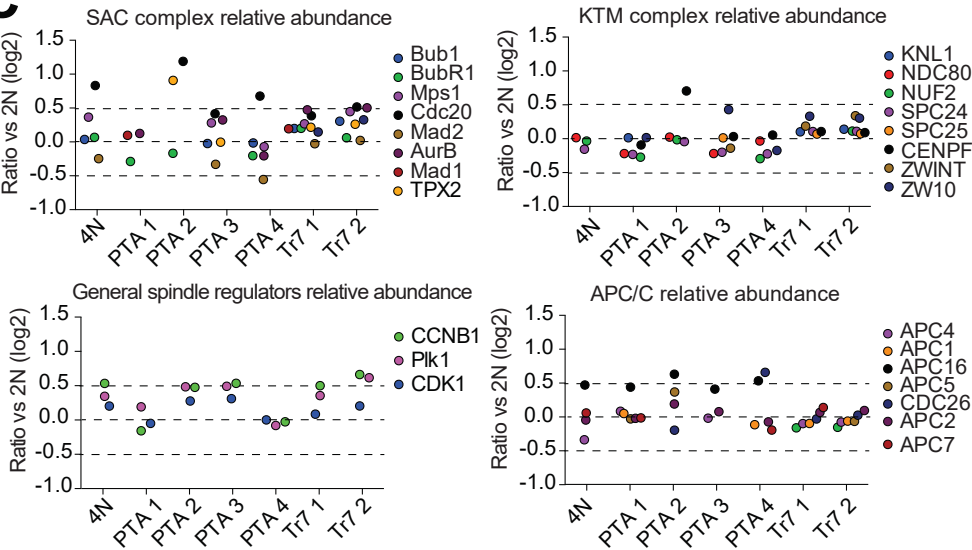

D

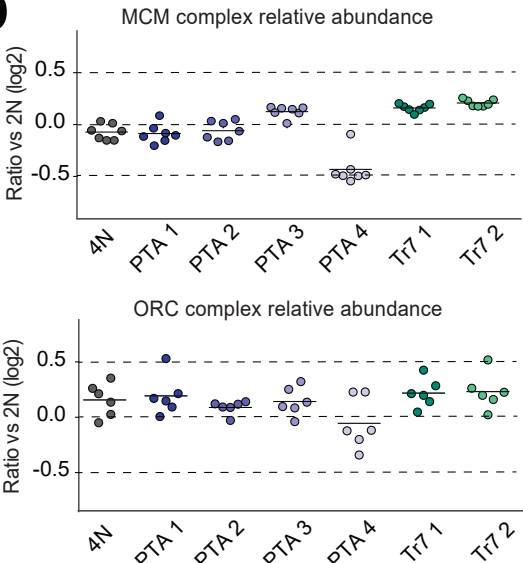

# Figure S5

## A

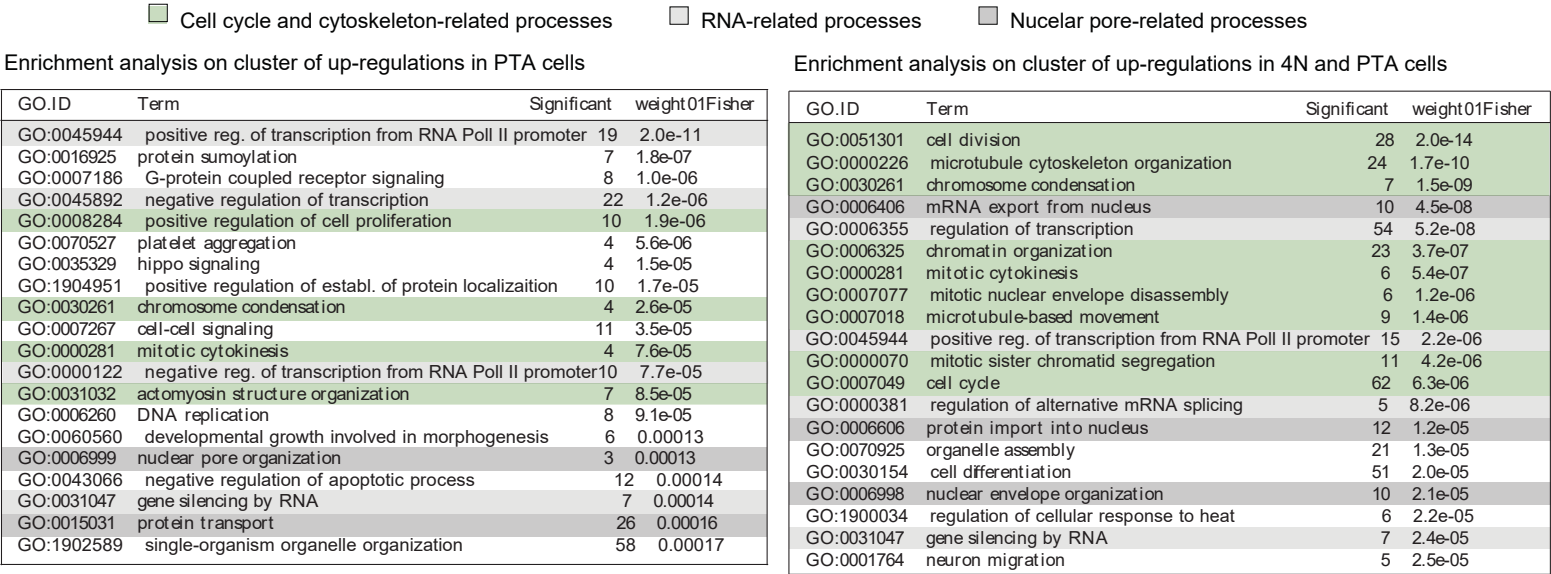

Enrichment analysis on cluster of up-regulations in 4N and PTA cells

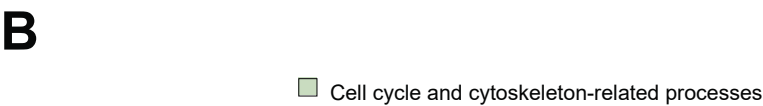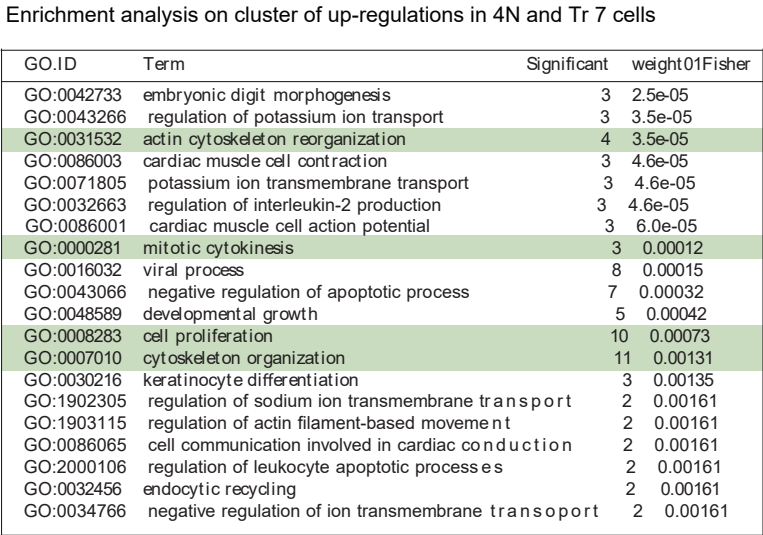

Figure S6

A

STRING network analysis  
Cluster of up-regulations in PTA cells

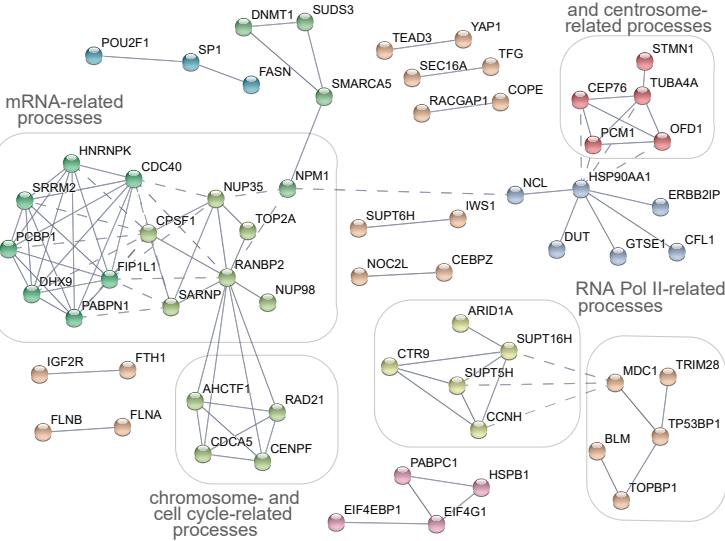

B

STRING network analysis  
Cluster of up-regulations in 4N and PTA cells

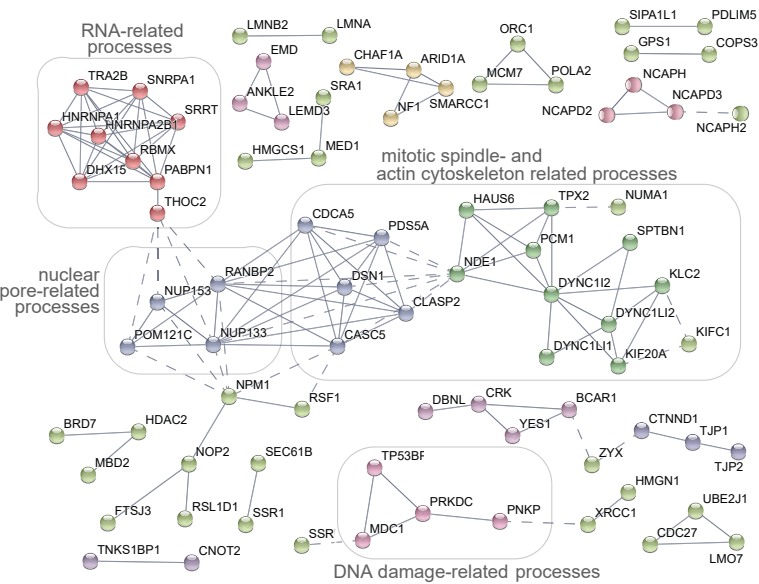

C

STRING network analysis  
Cluster of up-regulations in Tr 7 cells

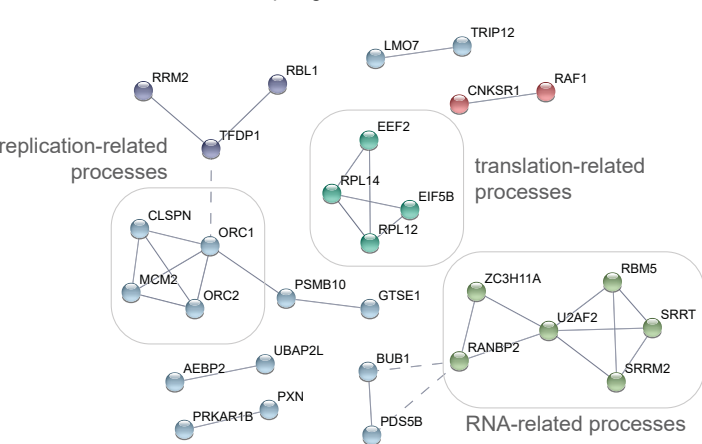

D

STRING network analysis  
Cluster of up-regulations in 4N and Tr 7 cells

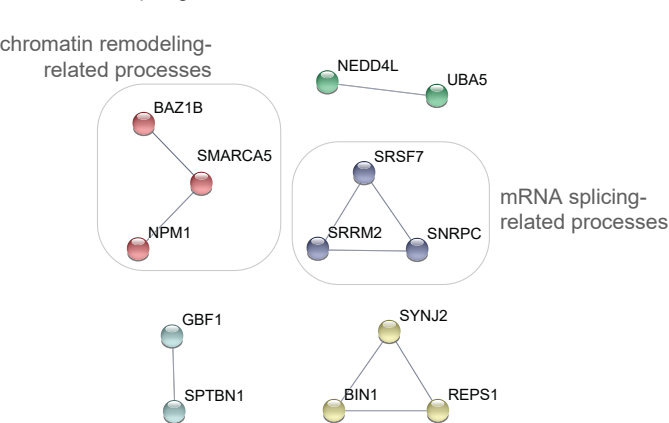

# Figure S7

## A

| CIN/cell division inclusion list enrichment analysis of the most deregulated phospho-peptides (500 phospho-peptides per condition) |         |              |            |          |           |
|------------------------------------------------------------------------------------------------------------------------------------|---------|--------------|------------|----------|-----------|
| phospho-peptides up-regulated in 4N and PTA cells                                                                                  |         |              |            |          |           |
| signlList                                                                                                                          | totSign | nonSignlList | totNonSign | ftPValue |           |
| 4N                                                                                                                                 | 80      | 324          | 2563       | 12305    | 0.1466766 |
| PTA 1                                                                                                                              | 94      | 322          | 2551       | 12317    | 0.0119480 |
| PTA 3                                                                                                                              | 79      | 260          | 2556       | 12312    | 0.0113770 |
| PTA 4                                                                                                                              | 62      | 214          | 2562       | 12306    | 0.0393165 |

| phospho-peptides up-regulated in Tr7cells |         |              |            |          |           |
|-------------------------------------------|---------|--------------|------------|----------|-----------|
| signlList                                 | totSign | nonSignlList | totNonSign | ftPValue |           |
| 4N                                        | 55      | 223          | 1326       | 7133     | 0.0735379 |
| Tr7 d1                                    | 57      | 204          | 1342       | 7117     | 0.5997863 |
| Tr7 d2                                    | 56      | 216          | 1319       | 7140     | 0.0405239 |

| phospho-peptides down-regulated in 4N and PTA cells |         |              |            |          |           |
|-----------------------------------------------------|---------|--------------|------------|----------|-----------|
| signlList                                           | totSign | nonSignlList | totNonSign | ftPValue |           |
| 4N                                                  | 14      | 82           | 2563       | 12305    | 0.7590456 |
| PTA 1                                               | 12      | 72           | 2551       | 12317    | 0.7648565 |
| PTA 3                                               | 32      | 139          | 2556       | 12312    | 0.8686990 |
| PTA 4                                               | 33      | 191          | 2562       | 12306    | 0.8217455 |

| phospho-peptides down-regulated in Tr7cells |         |              |            |          |           |
|---------------------------------------------|---------|--------------|------------|----------|-----------|
| signlList                                   | totSign | nonSignlList | totNonSign | ftPValue |           |
| 4N                                          | 37      | 185          | 1326       | 7133     | 0.3941695 |
| Tr7 d1                                      | 39      | 220          | 1342       | 7117     | 0.6436645 |
| Tr7 d2                                      | 43      | 185          | 1319       | 7140     | 0.1498234 |

## B

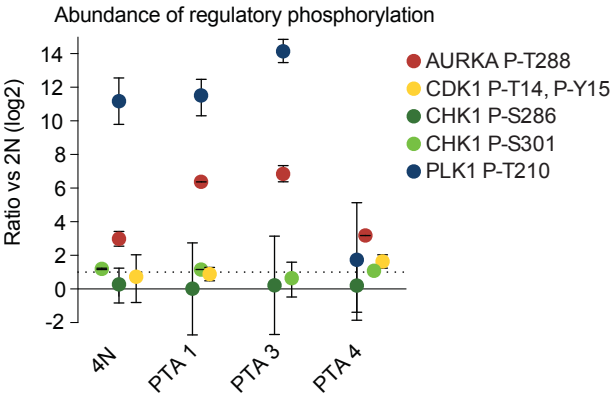

## C

| p-values for selected phopho-peptides |                                                    | 4N    | PTA 1 | PTA 3 | PTA 4 |
|---------------------------------------|----------------------------------------------------|-------|-------|-------|-------|
| Kinase, P-site                        | role of P-site                                     |       |       |       |       |
| AURKA P-T288                          | activating, T-loop                                 | 0.025 | 0.000 | 0.021 | 0.002 |
| CDK1 P-T14/ P-Y15                     | inhibitory upon stalled replication and DNA damage | 0.207 | 0.027 | 0.013 | 0.027 |
| CHK1 P-S301                           | upon stalled replication and DNA damage            | 0.001 | 0.002 | 0.187 | 0.016 |
| CHK1 P-S286                           | upon stalled replication and DNA damage            | 0.158 | 0.469 | 0.479 | 0.297 |
| PLK1 P-T210                           | activating, T-loop                                 | 0.195 | 0.168 | 0.055 | 0.554 |
